# Supplementary material
Source: PubMed Central journal article supplement (PMC1891243)

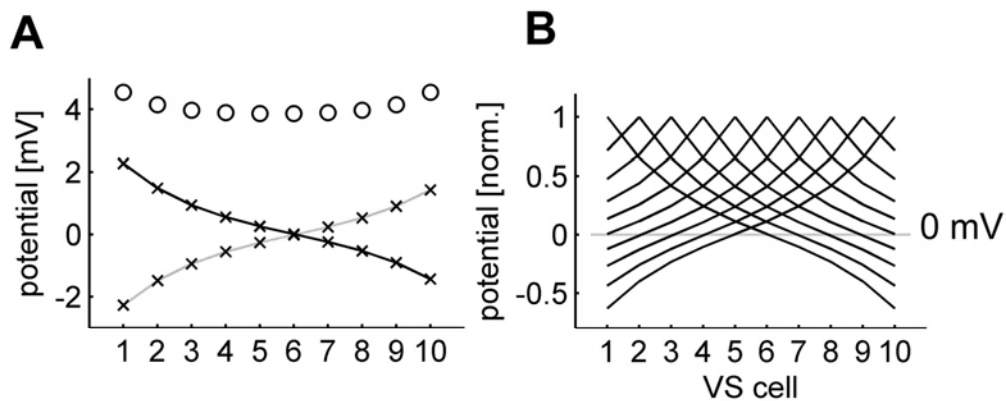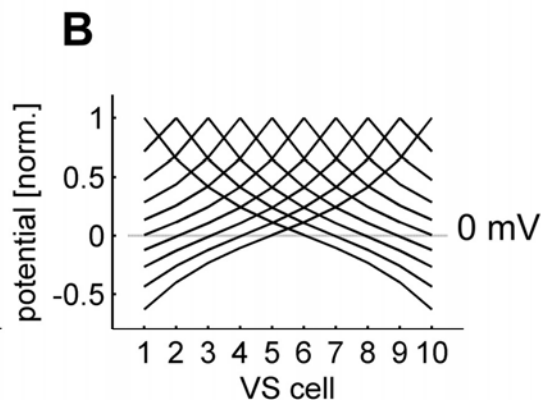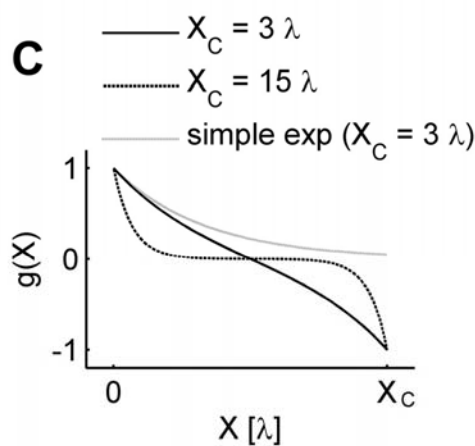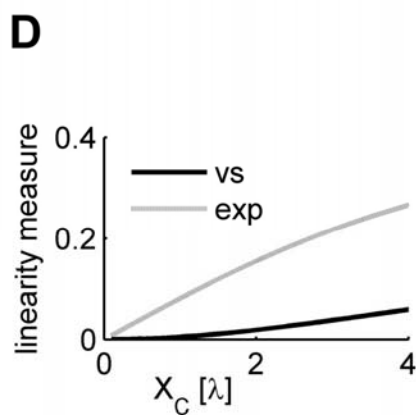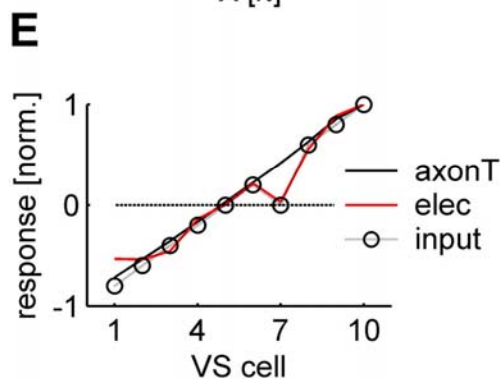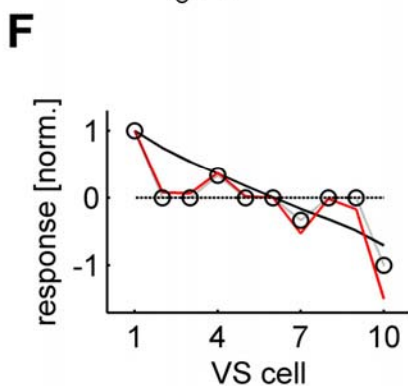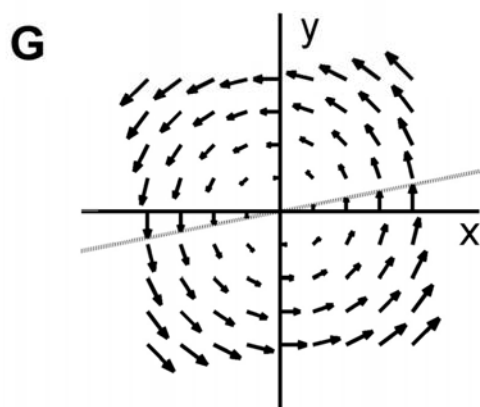

Supplement: pnas_0703697104_1.pdf [file pnas_0703697104_1.pdf]

**A**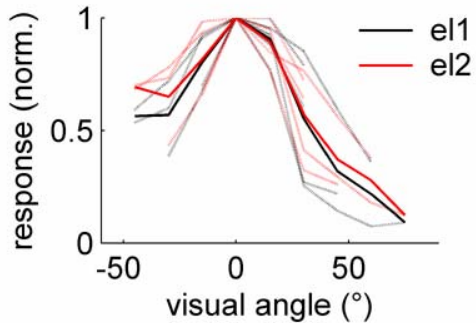**B**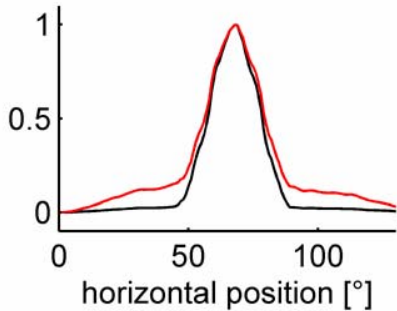

Supplement: pnas_0703697104_2.pdf [file pnas_0703697104_2.pdf]

VS cell

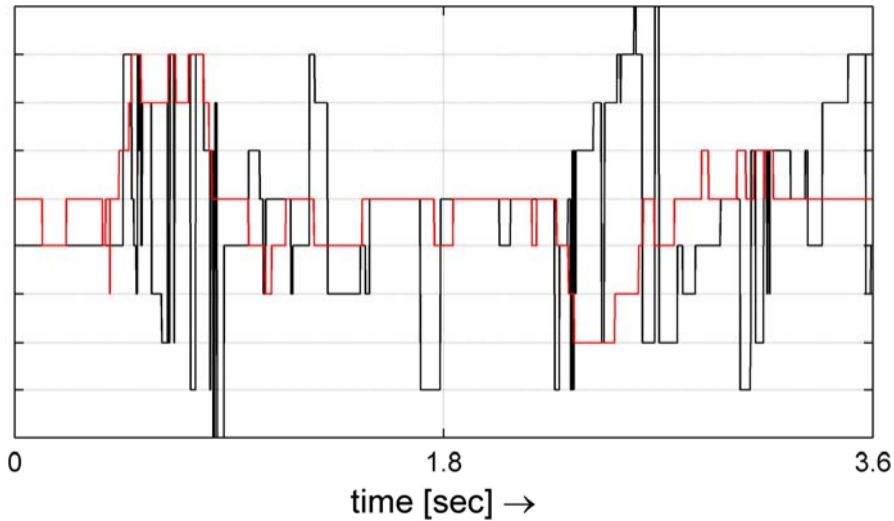

Supplement: pnas_0703697104_3.pdf [file pnas_0703697104_3.pdf]

**A**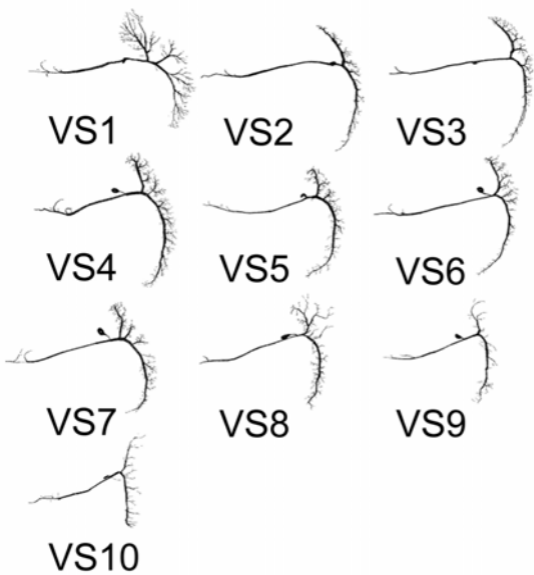**B**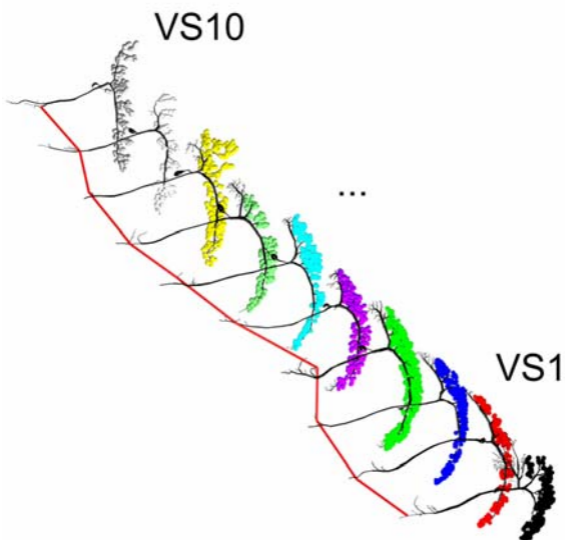

Supplement: pnas_0703697104_4.pdf [file pnas_0703697104_4.pdf]
